# Supplementary material for: Neoceroplatus betaryiensis nov. sp. (Diptera: Keroplatidae) is the first record of a bioluminescent fungus-gnat in South America
Source: PubMed Central journal article supplement (PMC6683459; doi:10.1038/s41598-019-47753-w), 2019-08-05
Supplement: 41598_2019_47753_MOESM3_ESM.pdf [file 41598_2019_47753_MOESM3_ESM.pdf]

# SUPPLEMENTARY DATA

## ***Neoceroplatus betaryiensis* nov. sp. (Diptera: Keroplatidae) is the first record of a bioluminescent fungus-gnat in South America**

Rafaela L. Falaschi<sup>1</sup>, Danilo T. Amaral<sup>2</sup>, Isaias Santos<sup>3</sup>, Adão H. R. Domingos<sup>3</sup>, Grant A. Johnson<sup>3</sup>, Ana G. S. Martins<sup>3</sup>, Imran B. Viroomal<sup>3</sup>, Sérgio L. Pompéia<sup>3</sup>, Jeremy D. Mirza<sup>4,5</sup>, Anderson G. Oliveira<sup>5</sup>, Etelvino J. H. Bechara<sup>6,\*</sup>, Vadim R. Viviani<sup>2,\*</sup> & Cassius V. Stevani<sup>6,\*</sup>

<sup>1</sup>Departamento de Biologia Estrutural, Molecular e Genética, Programa de Pós-Graduação em Biologia Evolutiva, Universidade Estadual de Ponta Grossa, Ponta Grossa, PR, Brazil. <sup>2</sup>Depto Física, Química e Matemática, Graduate School of Biotechnology and Environmental Monitoring (UFSCar), Sorocaba, SP, Brazil. <sup>3</sup>IPBio - Instituto de Pesquisas da Biodiversidade, Iporanga, SP, Brazil. <sup>4</sup>Departamento de Química, Instituto de Ciências Ambientais, Químicas e Farmacêuticas, Universidade Federal de São Paulo, Diadema, SP, Brazil. <sup>5</sup>Departamento de Oceanografia Física, Química e Geológica, Instituto Oceanográfico, Universidade de São Paulo, Brazil. <sup>6</sup>Departamento de Química Fundamental, Instituto de Química, Universidade de São Paulo, São Paulo, Brazil. Correspondence and requests for materials should be addressed to V.R.V (email: viviani@ufscar.br), E.J.H.B. (email: ebechara@iq.usp.br) or C.V.S (email: stevani@iq.usp.br)

### TABLE OF CONTENTS

**Figure S1.** *Neoceroplatus betaryiensis* nov. sp. (A) Male antenna. (B) Male last flagellomere in detail. (C) Female antenna. (D) Female dorsal view of the thorax. (E) Female lateral view of the thorax. (F) Male wing (G) Female wing.

**Figure S2.** *Neoceroplatus betaryiensis* nov. sp. (A) Male dorsal view of the abdomen. (B) Male ventral view of the abdomen. (C) Male lateral view of the abdomen. (D) Female dorsal view of the abdomen. (E) Female ventral view of the abdomen. (F) Female lateral view of the abdomen. Scale bar: 1 mm.

**Figure S3.** *Neoceroplatus betaryiensis* nov. sp. (A) Ventral view of the male terminalia. (B) Dorsal view of the female terminalia. (C) Dorsal view of the male terminalia. (D) Ventral view of the female terminalia. (E) Lateral view of the male terminalia. (F) Lateral view of the female terminalia.

**Figure S4.** *Neoceroplatus betaryiensis* nov. sp. (A) Dorsal view of the male terminalia. (B) Lateral view of the male terminalia. (C) Detail of the inner face of the gonostylus. (D) Dorsal view of the female terminalia. (E) Lateral view of the female terminalia. Abbreviations: Aed, aedeagus; Cs, cercus; Gs, gonostylus; Gx, gonocoxite; S8, sternite 8; T10, tergite 10; T8, tergite 8; T9, tergite 9.

**Figure S5.** *Neoceroplatus betaryiensis* nov. sp. (A) Larva, ventral view of the head. (B) Larva, dorsal view of the head. (C) Larva, dorsal view of the body (divided into four subquadrate areas). (D) Pupa exuvium.

**Video S1.** Larva of *Neoceroplatus betaryiensis* nov. sp. walking on a mushroom of *Favolus brasiliensis*.

**Video S2.** Larva of *Neoceroplatus betaryiensis* nov. sp. building up its web on a leaf.

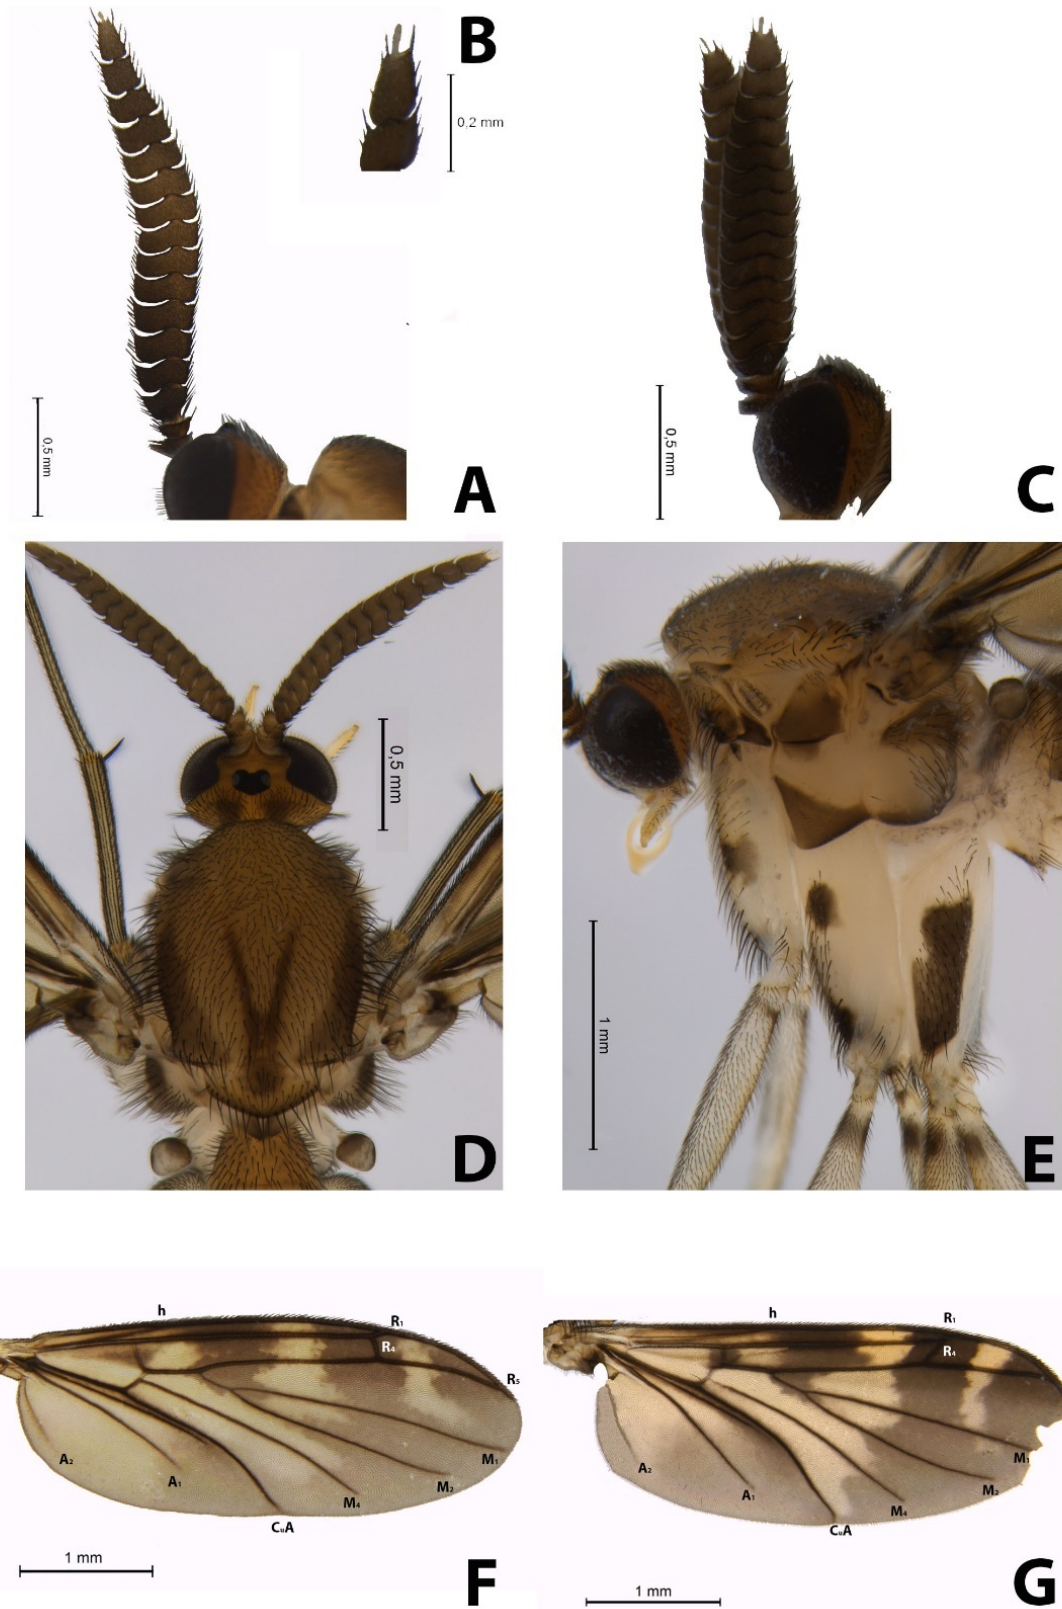

**Figure S1.** *Neoceroplatus betaryiensis* nov. sp. (A) Male antenna. (B) Male last flagellomere in detail. (C) Female antenna. (D) Female dorsal view of the thorax. (E) Female lateral view of the thorax.

(F) Male wing (G) Female wing.

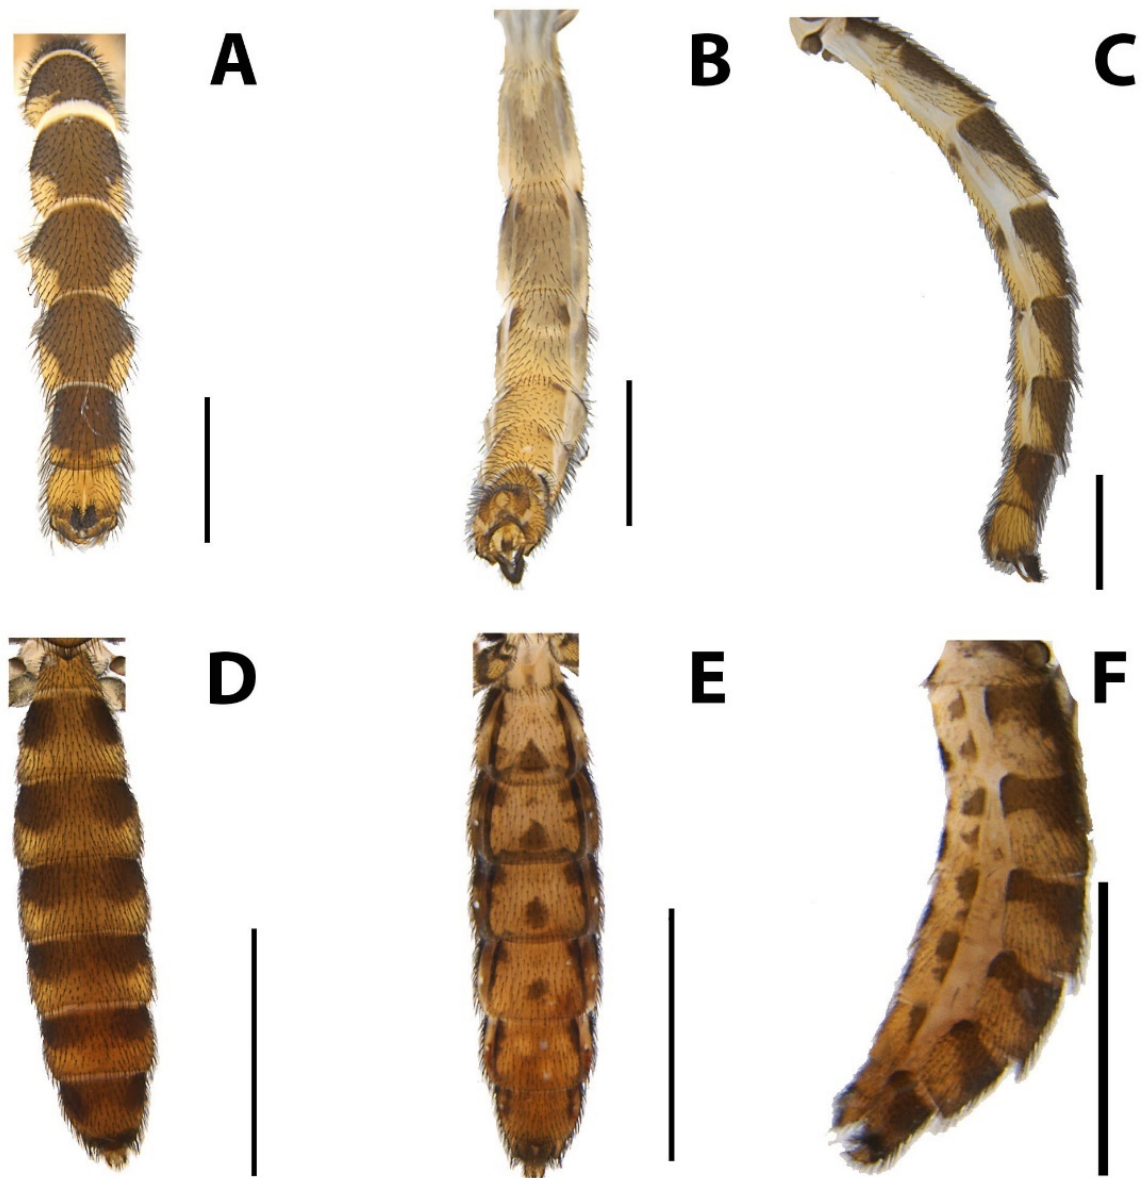

**Figure S2.** *Neoceroplatus betaryiensis* nov. sp. (A) Male dorsal view of the abdomen. (B) Male ventral view of the abdomen. (C) Male lateral view of the abdomen. (D) Female dorsal view of the abdomen. (E) Female ventral view of the abdomen. (F) Female lateral view of the abdomen. Scale bar: 1 mm.

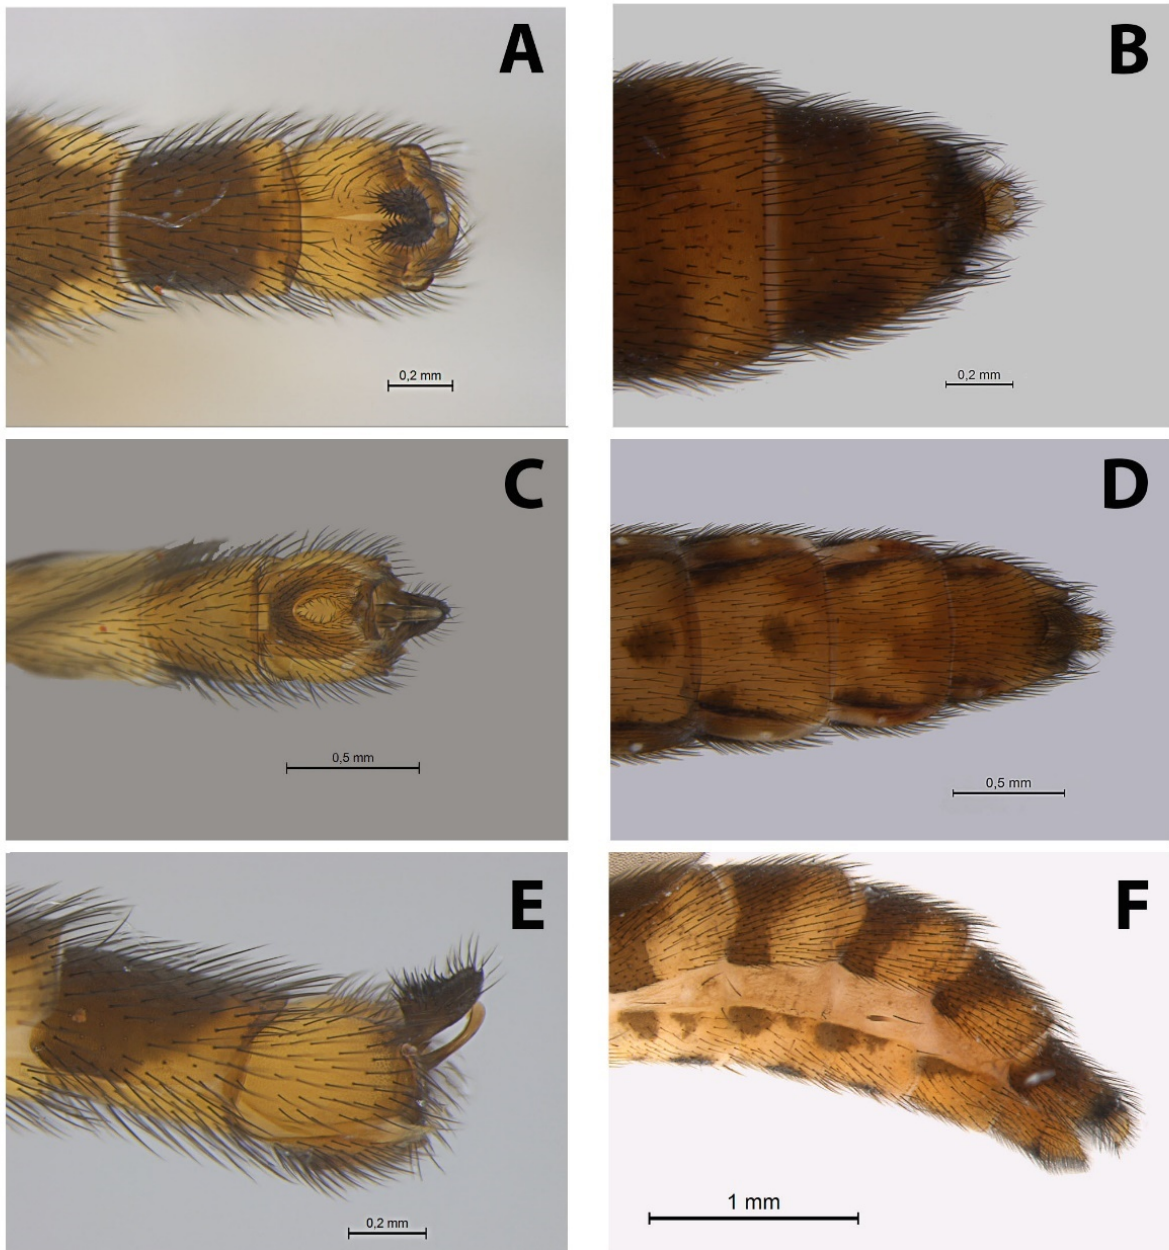

**Figure S3.** *Neoceroplastus betaryiensis* nov. sp. (A) Ventral view of the male terminalia. (B) Dorsal view of the female terminalia. (C) Dorsal view of the male terminalia. (D) Ventral view of the female terminalia. (E) Lateral view of the male terminalia. (F) Lateral view of the female terminalia.

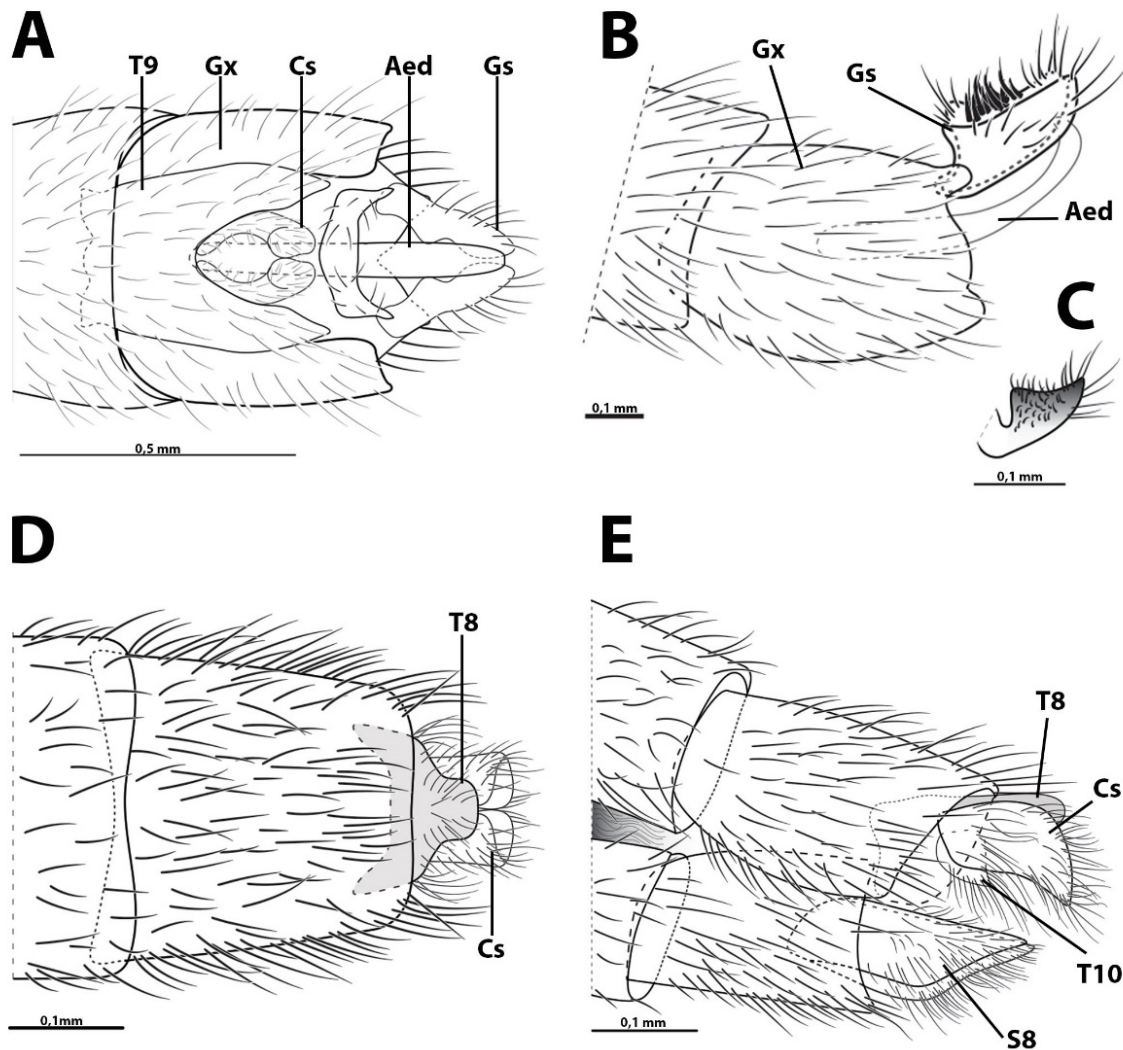

**Figure S4.** *Neoceroplatus betaryiensis* nov. sp. (A) Dorsal view of the male terminalia. (B) Lateral view of the male terminalia. (C) Detail of the inner face of the gonostylus. (D) Dorsal view of the female terminalia. (E) Lateral view of the female terminalia. Abbreviations: Aed, aedeagus; Cs, cercus; Gs, gonostylus; Gx, gonocoxite; S8, sternite 8; T10, tergite 10; T8, tergite 8; T9, tergite 9.

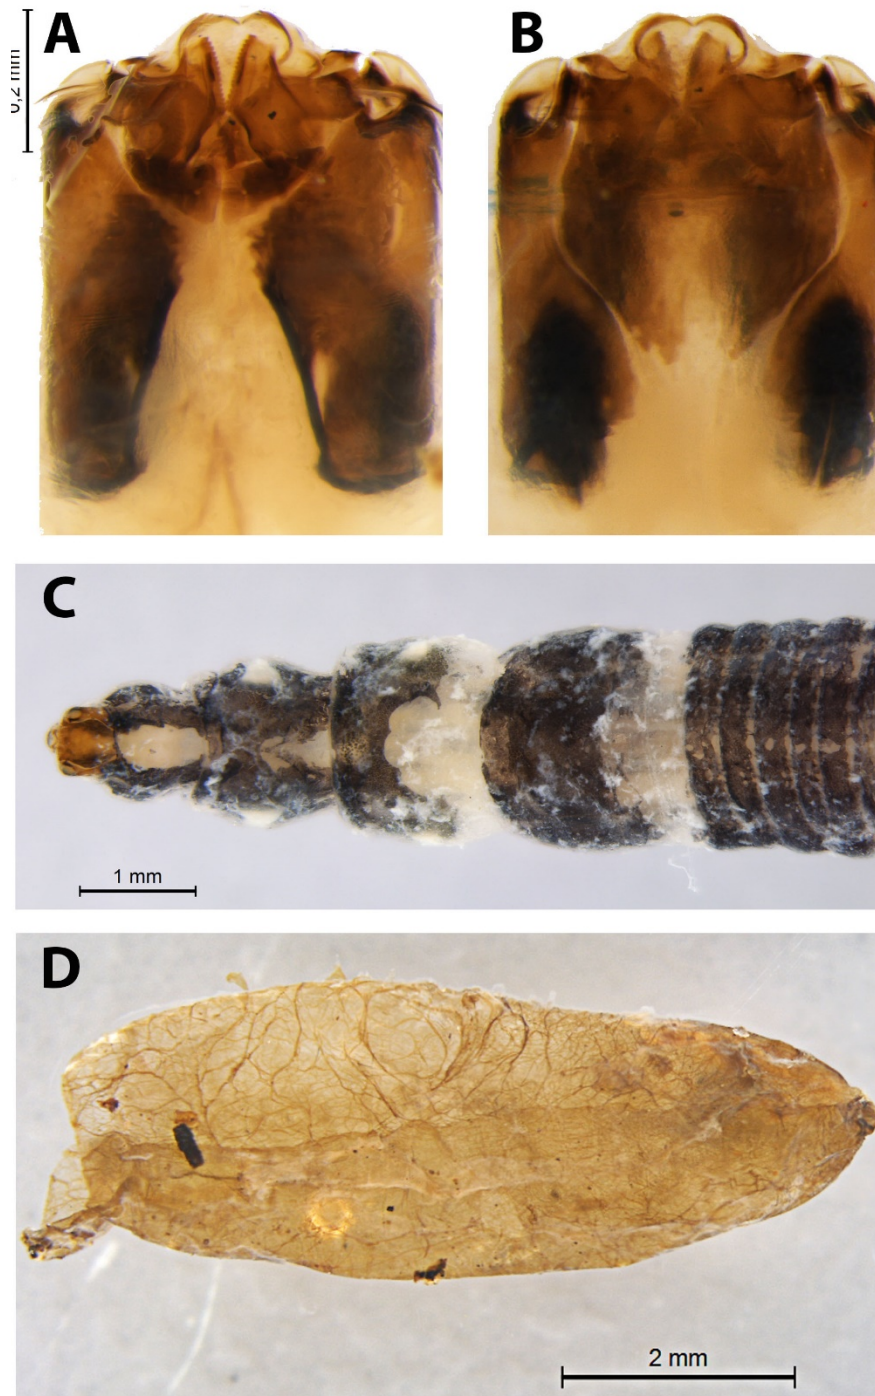

**Figure S5.** *Neoceroplatus betaryiensis* nov. sp. (A) Larva, ventral view of the head. (B) Larva, dorsal view of the head. (C) Larva, dorsal view of the body (divided into four subquadrate areas). (D) Pupa exuvium.
